# Supplementary material for: Equipping carbon dots in a defect-containing MOFviaself-carbonization for explosive sensing
Source: Royal Society of Chemistry journal article supplement (doi:10.1039/d2tc04513c), 2022-11-30
Supplement: d2tc04513c1.pdf [file d2tc04513c1.pdf]

## Electronic Supplementary Information

### Equipping carbon dots in a defect-containing MOF *via* self-carbonization for explosive sensing

Ling-Xiao Li,<sup>‡a</sup> Shan He,<sup>‡a</sup> Shanshan Zeng,<sup>b</sup> Wan-Tao Chen,<sup>c</sup> Jia-Wen Ye,<sup>\*c</sup> Hao-Long Zhou<sup>\*a, d</sup> and Xiao-Chun Huang<sup>a, e</sup>

<sup>a</sup> *Department of Chemistry and Key Laboratory for Preparation and Application of Ordered Structural Materials of Guangdong Province, Shantou University, Shantou 515063, China.*

<sup>b</sup> *Central Laboratory, Shantou University, Shantou 515063, China.*

<sup>c</sup> *School of Biotechnology and Health Science, Wuyi University, Jiangmen 529000, P. R. China.*

<sup>d</sup> *Key Laboratory of Organosilicon Chemistry and Material Technology of Ministry of Education, Hangzhou Normal University, Hangzhou 311121, P. R. China.*

<sup>e</sup> *Chemistry and Chemical Engineering Guangdong Laboratory, Shantou 515031, China.*

<sup>‡</sup> These authors contributed equally to this work.

<sup>\*</sup> Corresponding authors.

E-mail: [wychemyjw@126.com](mailto:wychemyjw@126.com); [hlzhou@stu.edu.cn](mailto:hlzhou@stu.edu.cn)

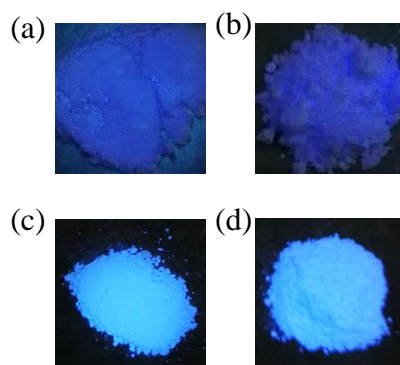

**Figure S1.** Photographs of (a) UiO-66, (b) DUiO-66, (c) UiO-66N and (d) DUiO-66N under 365-nm UV light. UiO-66 and DUiO-66 (*i.e.* defect-containing UiO-66) were according to the literature procedure.<sup>[1]</sup>

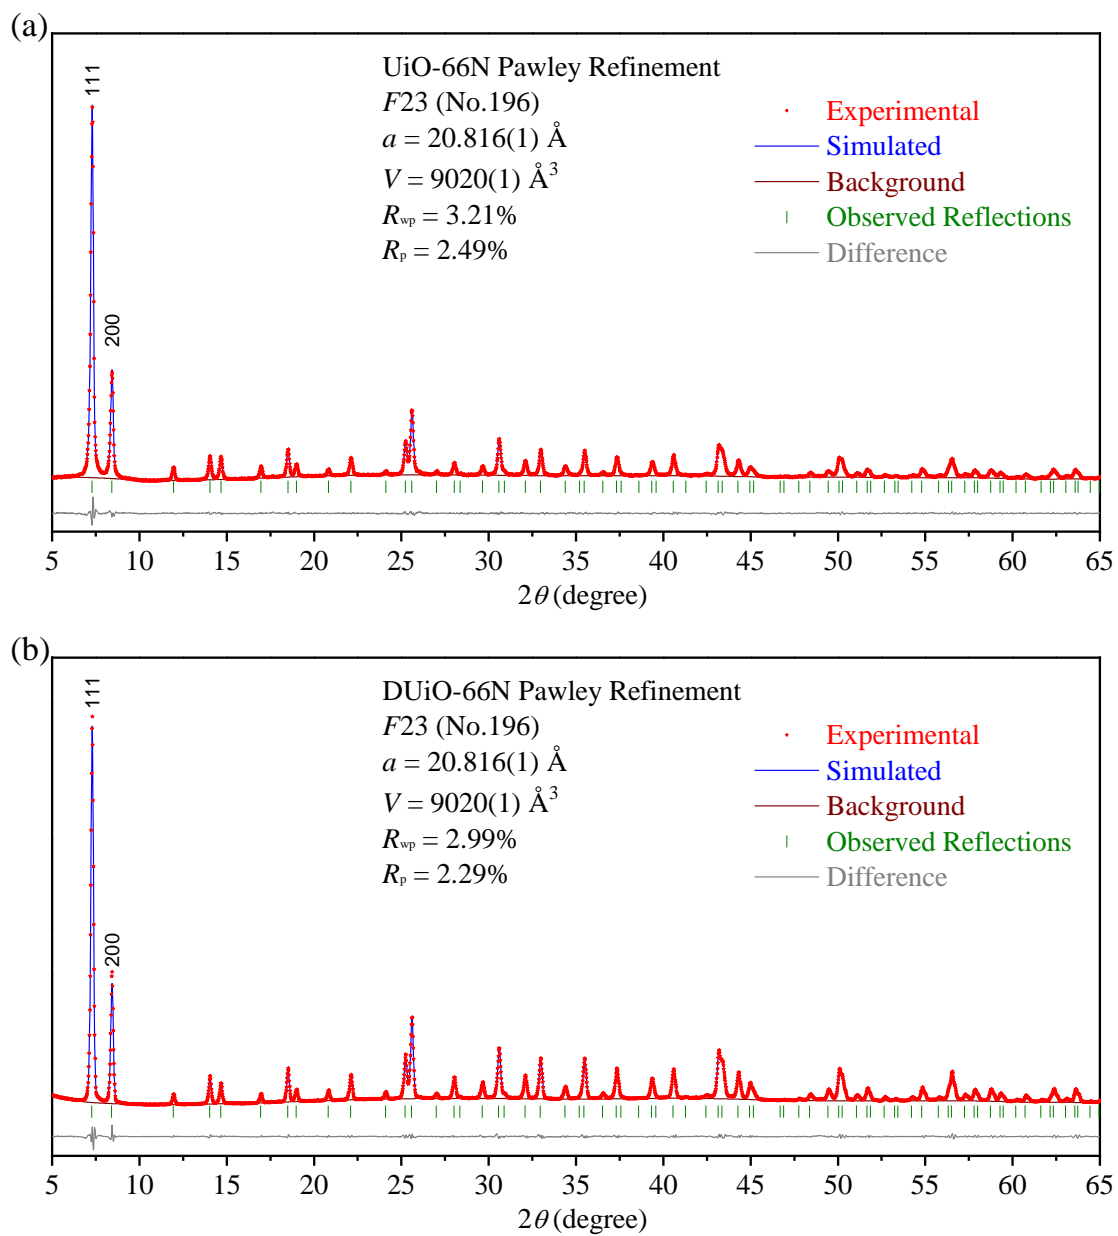

**Figure S2.** PXRD refinement of (a) UiO-66N and (b) DUiO-66N.

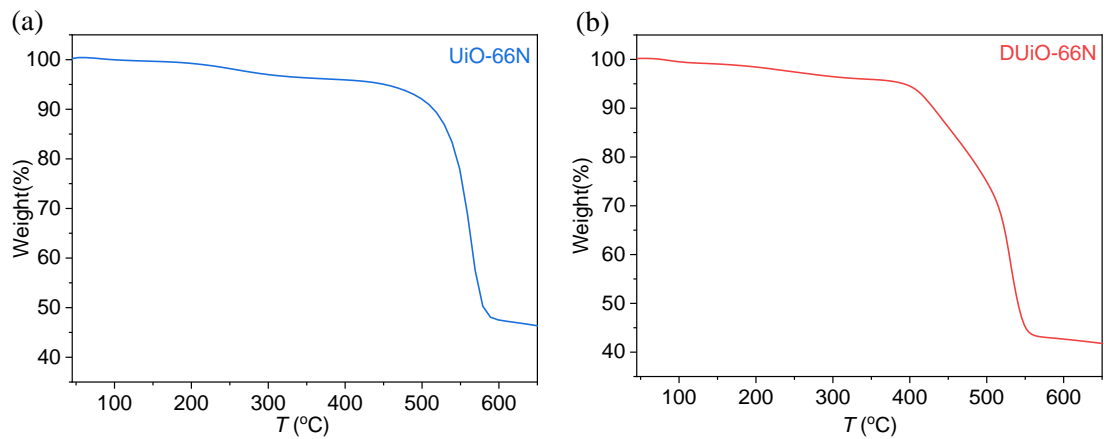

**Figure S3.** TGA curves of (a) UiO-66N and (b) DUiO-66N under nitrogen.

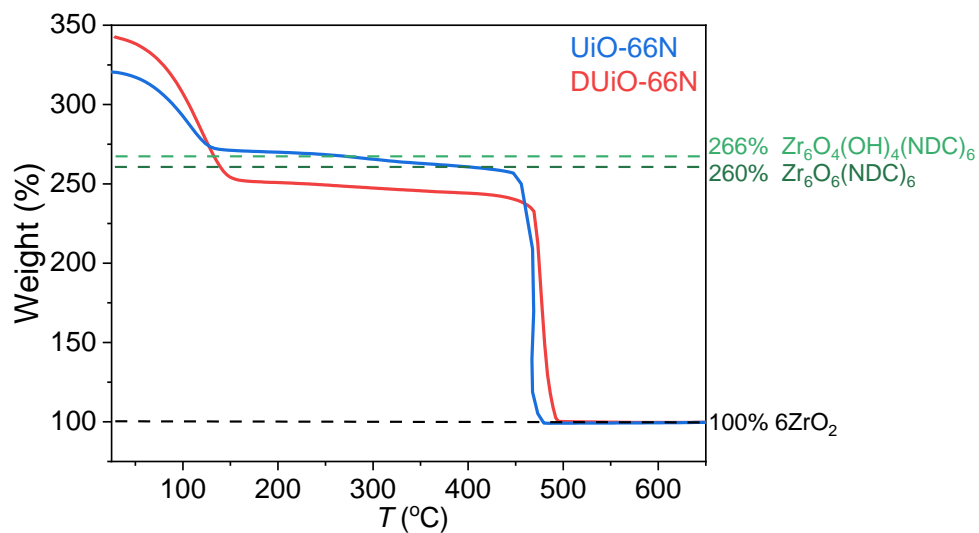

**Figure S4.** TGA curves of UiO-66N and DUiO-66N under oxygen.

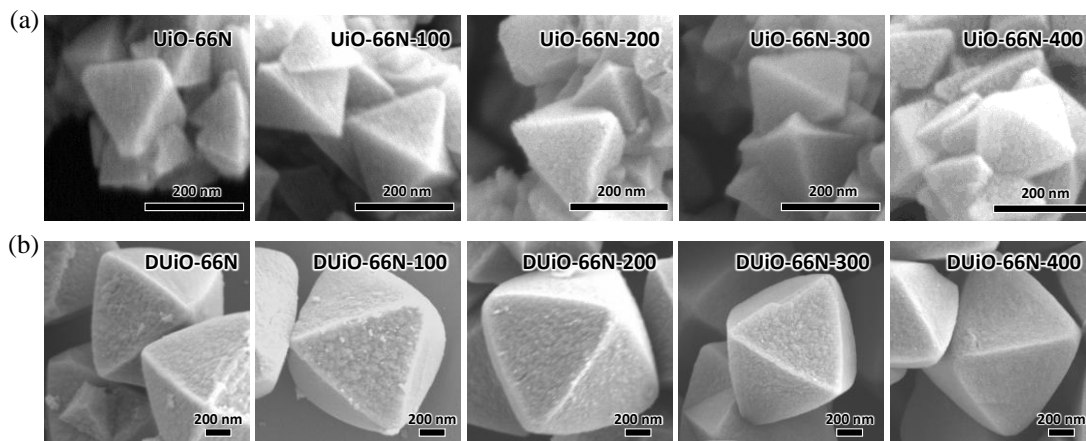

**Figure S5.** SEM images of (a) UiO-66N and (b) DUiO-66N.

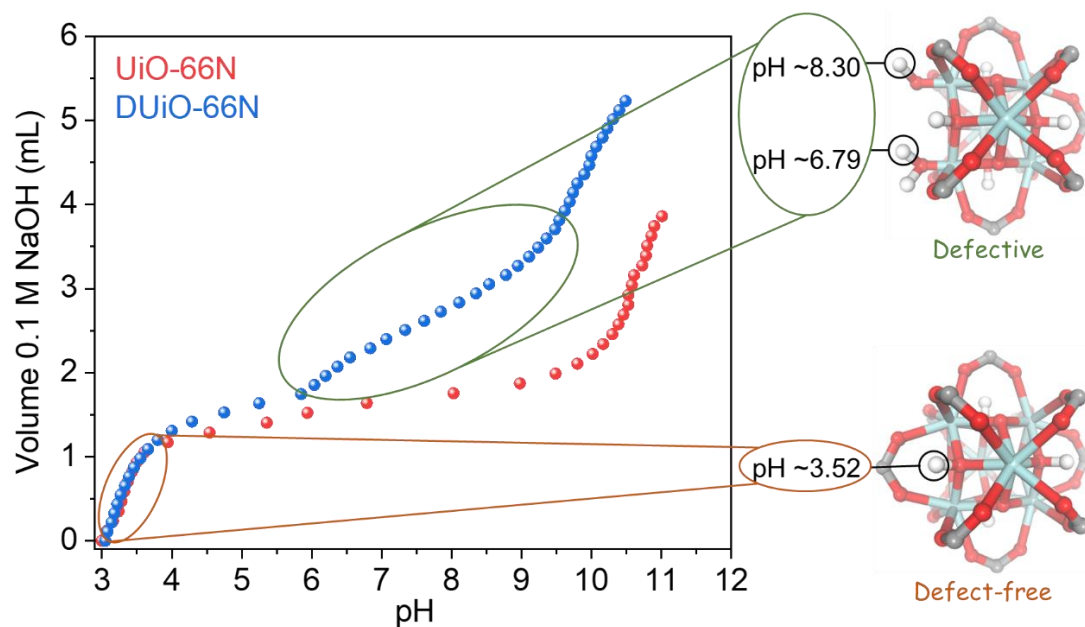

**Figure S6.** Potentiometric acid–base titration plots of UiO-66N and DUiO-66N.

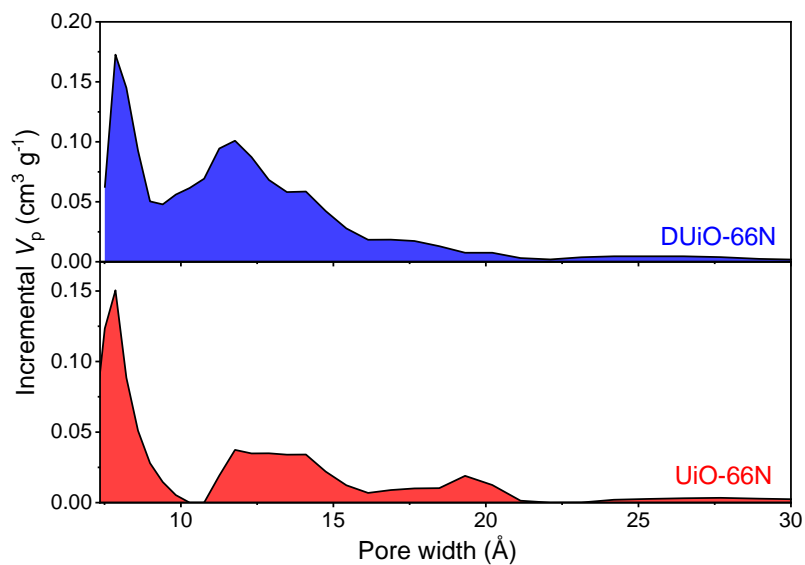

**Figure S7.** Pore size distribution of UiO-66N and DUiO-66N, derived from the non-local density functional theory (NLDFT) analysis of standard N<sub>2</sub> adsorption isotherms measured at 77 K.

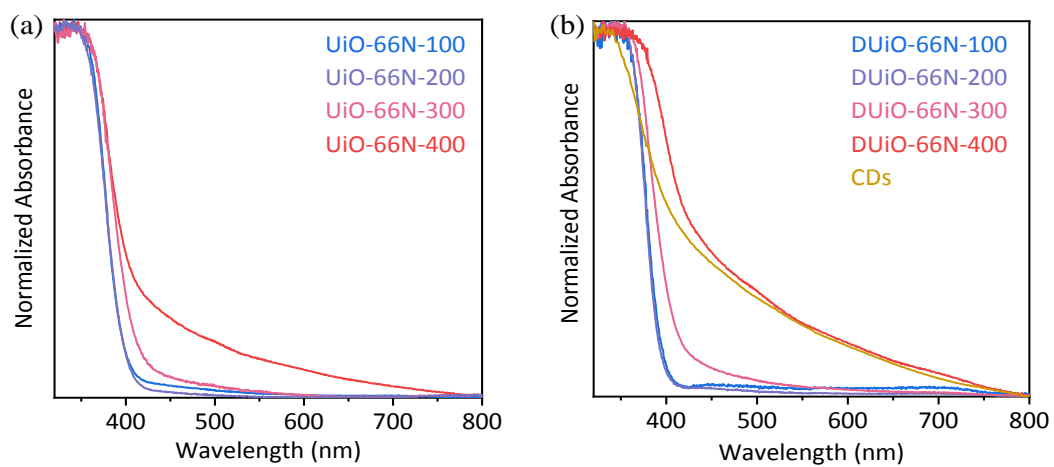

**Figure S8.** UV-vis absorption spectra of (a) UiO-66N-X, (b) DUiO-66N-X and CDs.

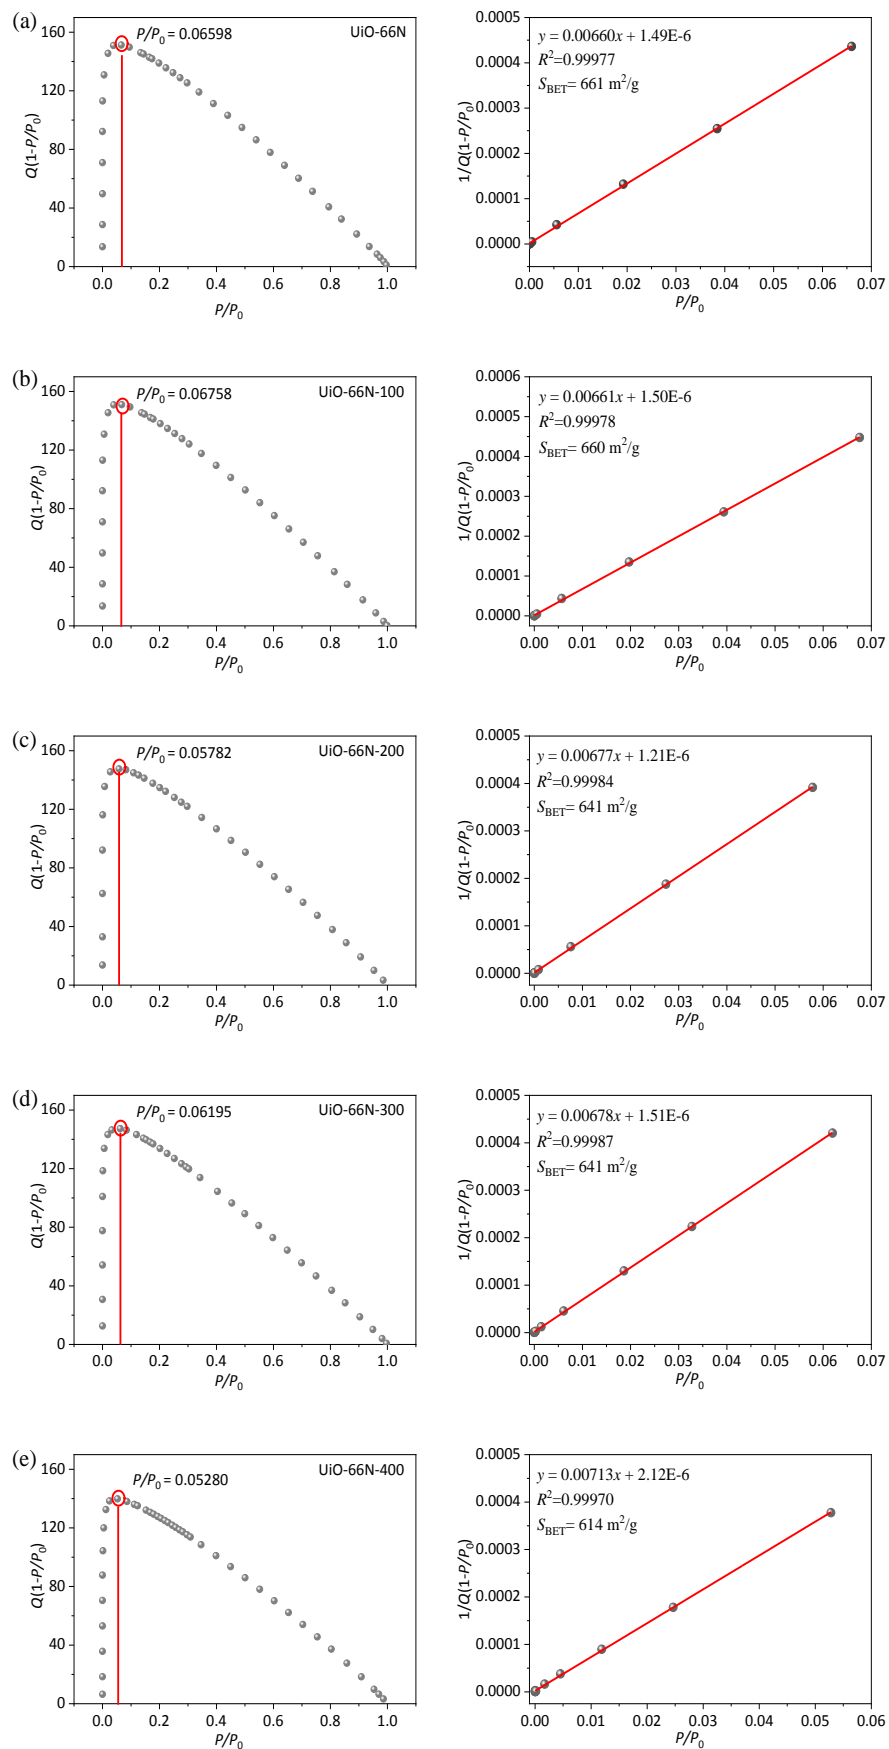

**Figure S9.** BET plots of (a) UiO-66N and (b-e) UiO-66N-X.

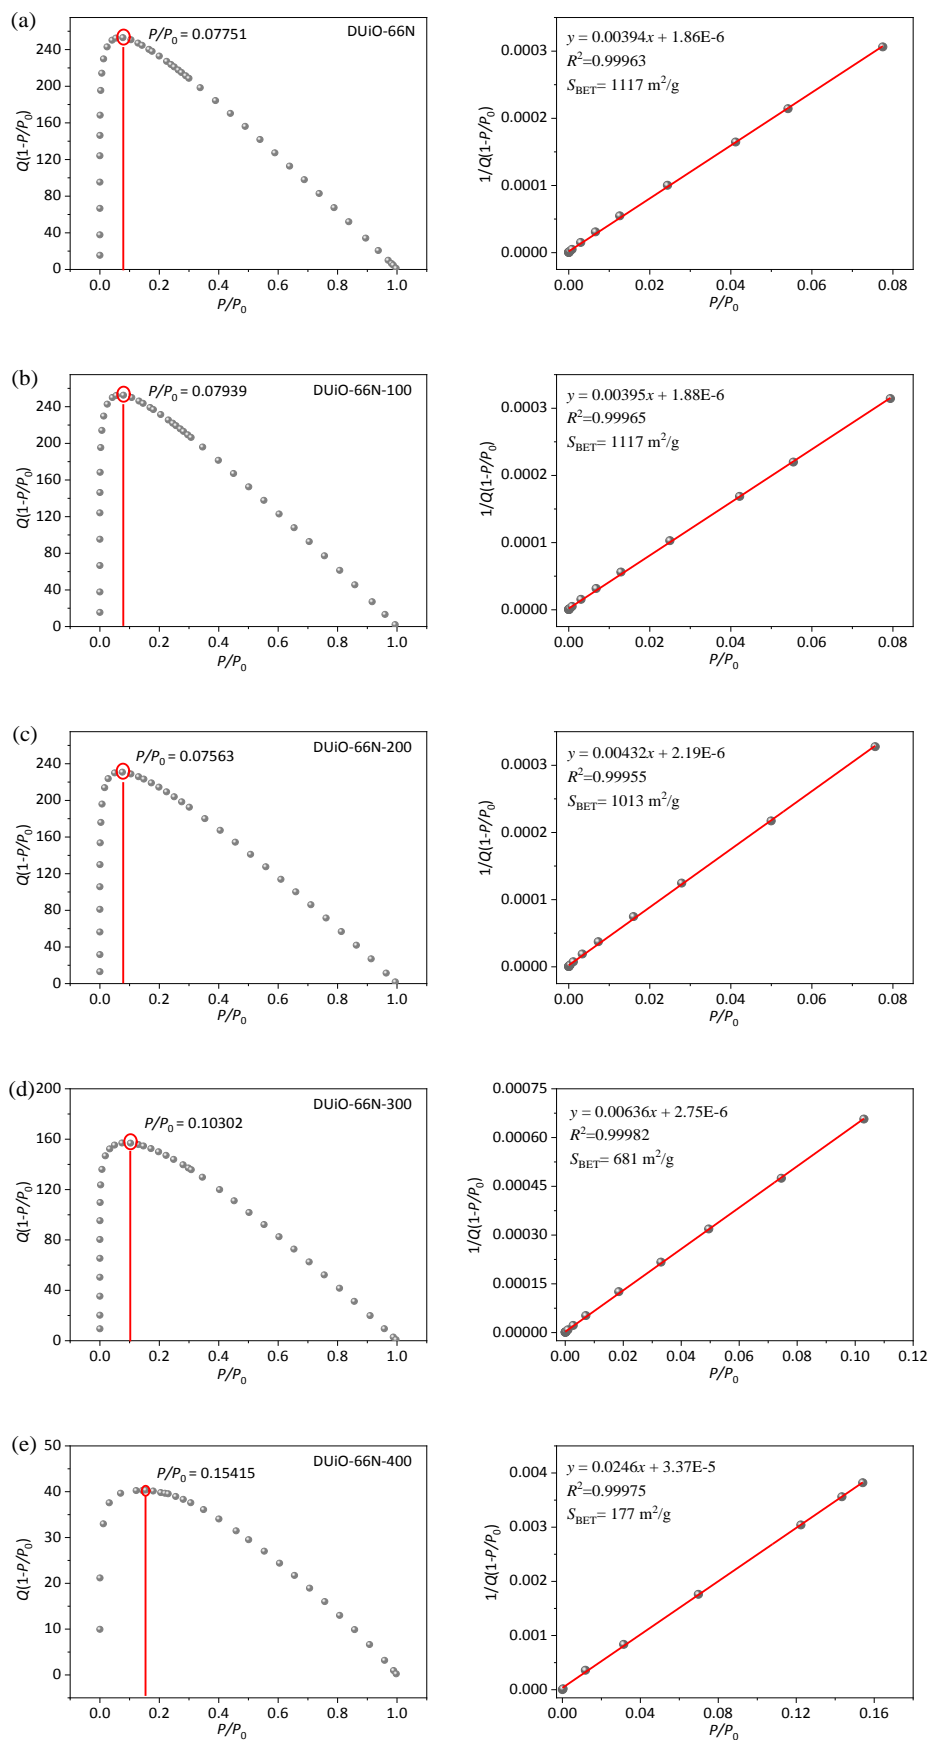

**Figure S10.** BET plots of (a) DUiO-66N and (b-e) DUiO-66N-X.



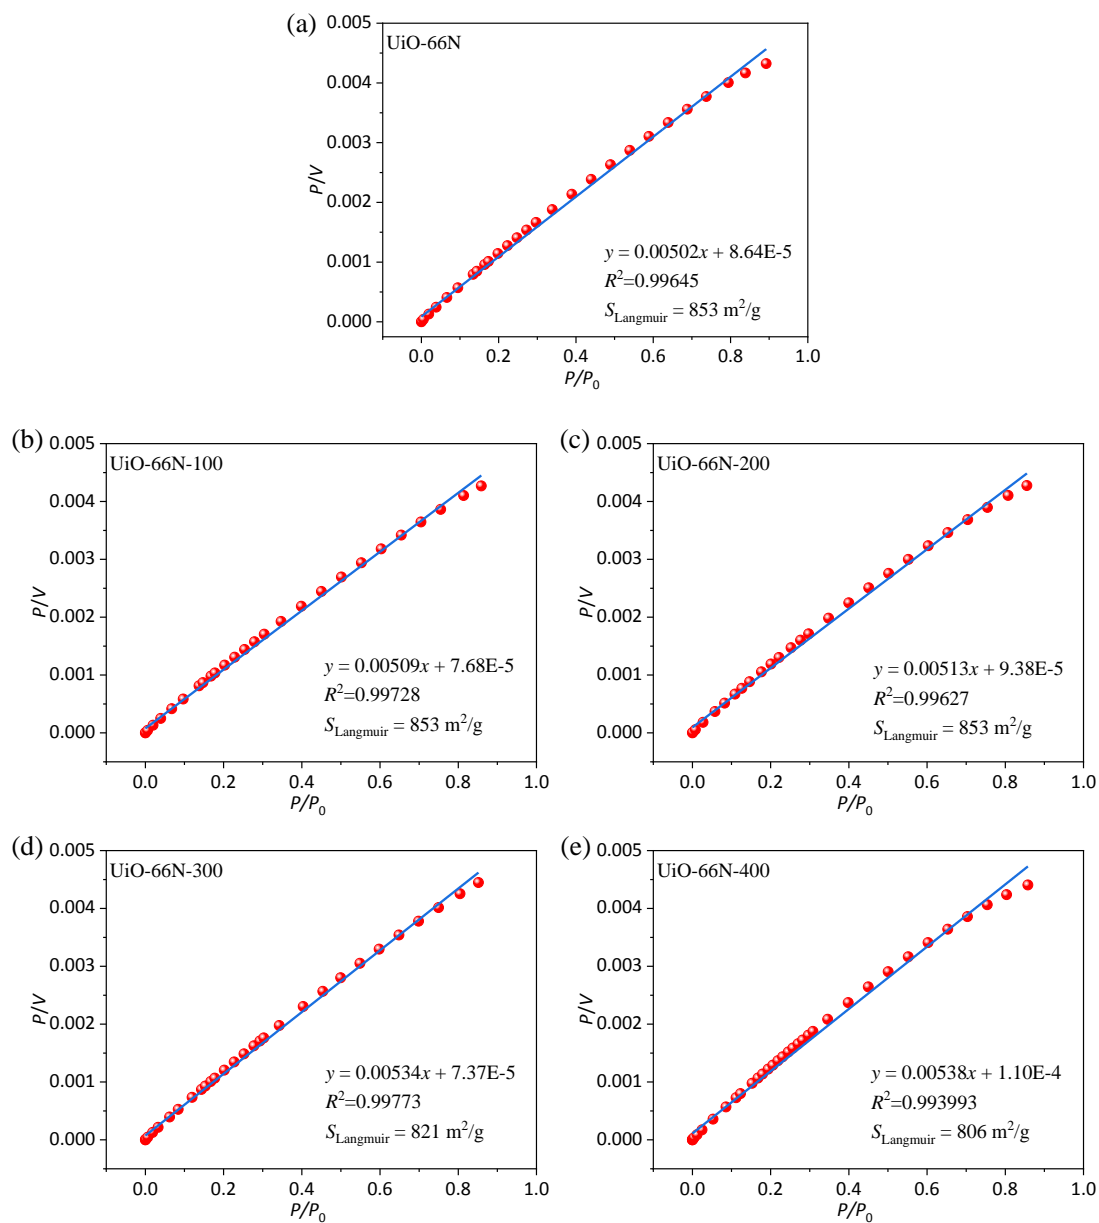

**Figure S11.** Langmuir plots of (a) UiO-66N and (b-e) UiO-66N-X.

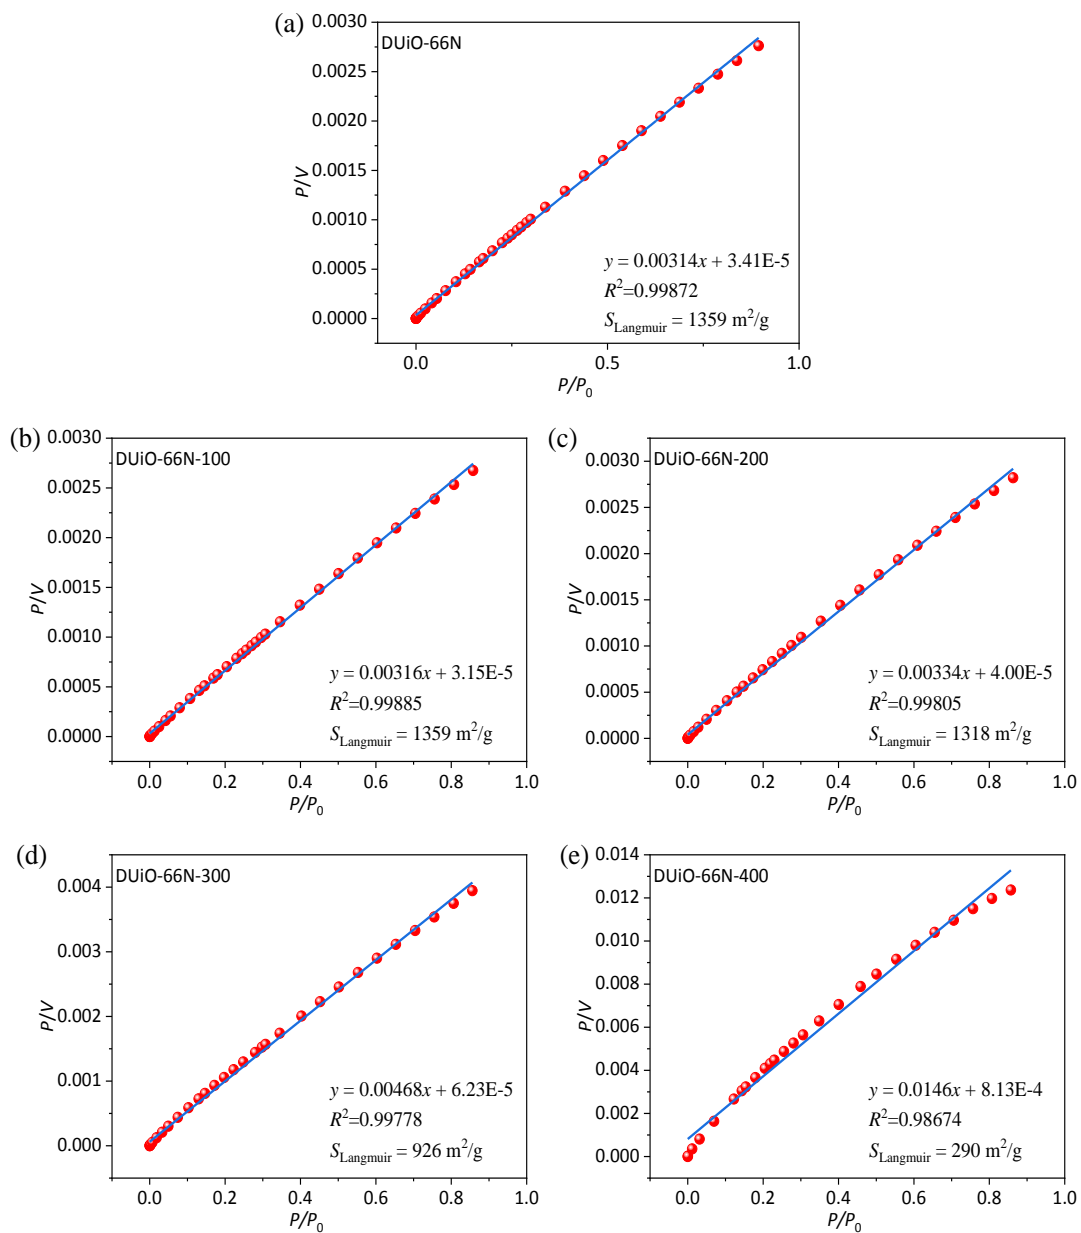

**Figure S12.** Langmuir plots of (a) DUiO-66N and (b-e) DUiO-66N-X.

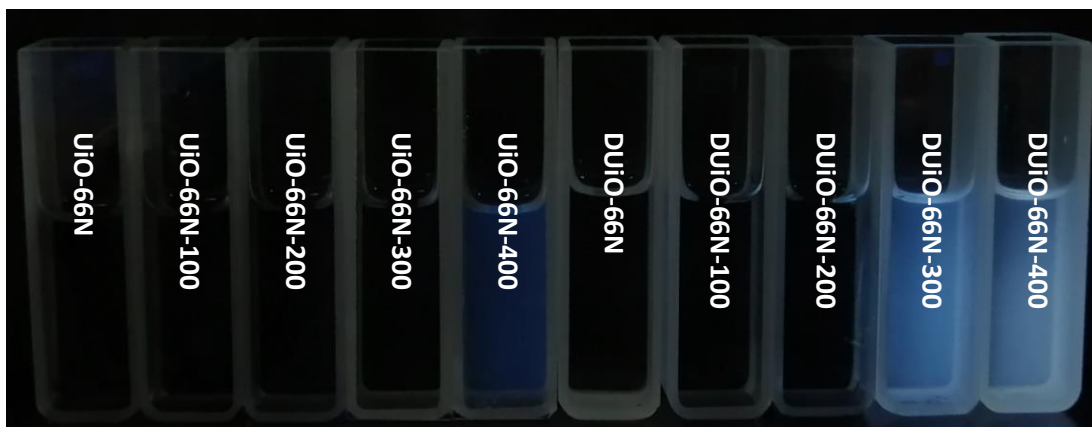

**Figure S13.** Photographs of the organic phase extract from digested samples under 365-nm UV light.

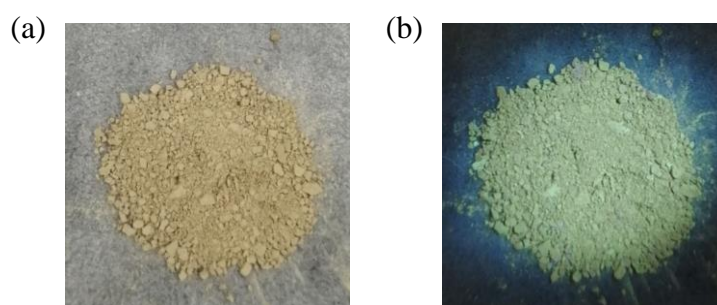

**Figure S14.** Photographs of CDs under (a) room light and (b) 365-nm UV light. Elemental analysis found(%): C : 85.72; H:12.22.

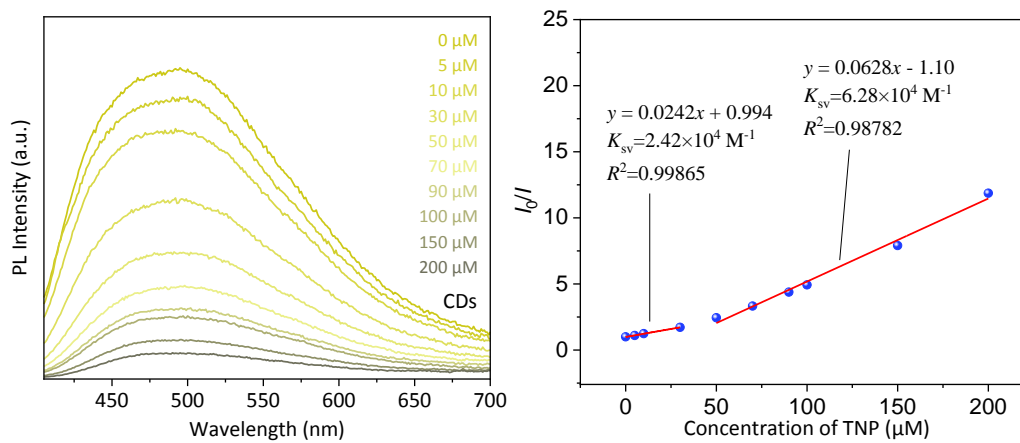

**Figure S15.** PL emission spectra in picric acid solutions with different concentrations ranging from 0 to 200  $\mu\text{M}$  (left) and the Stern-Volmer fitting plots of CDs (right).

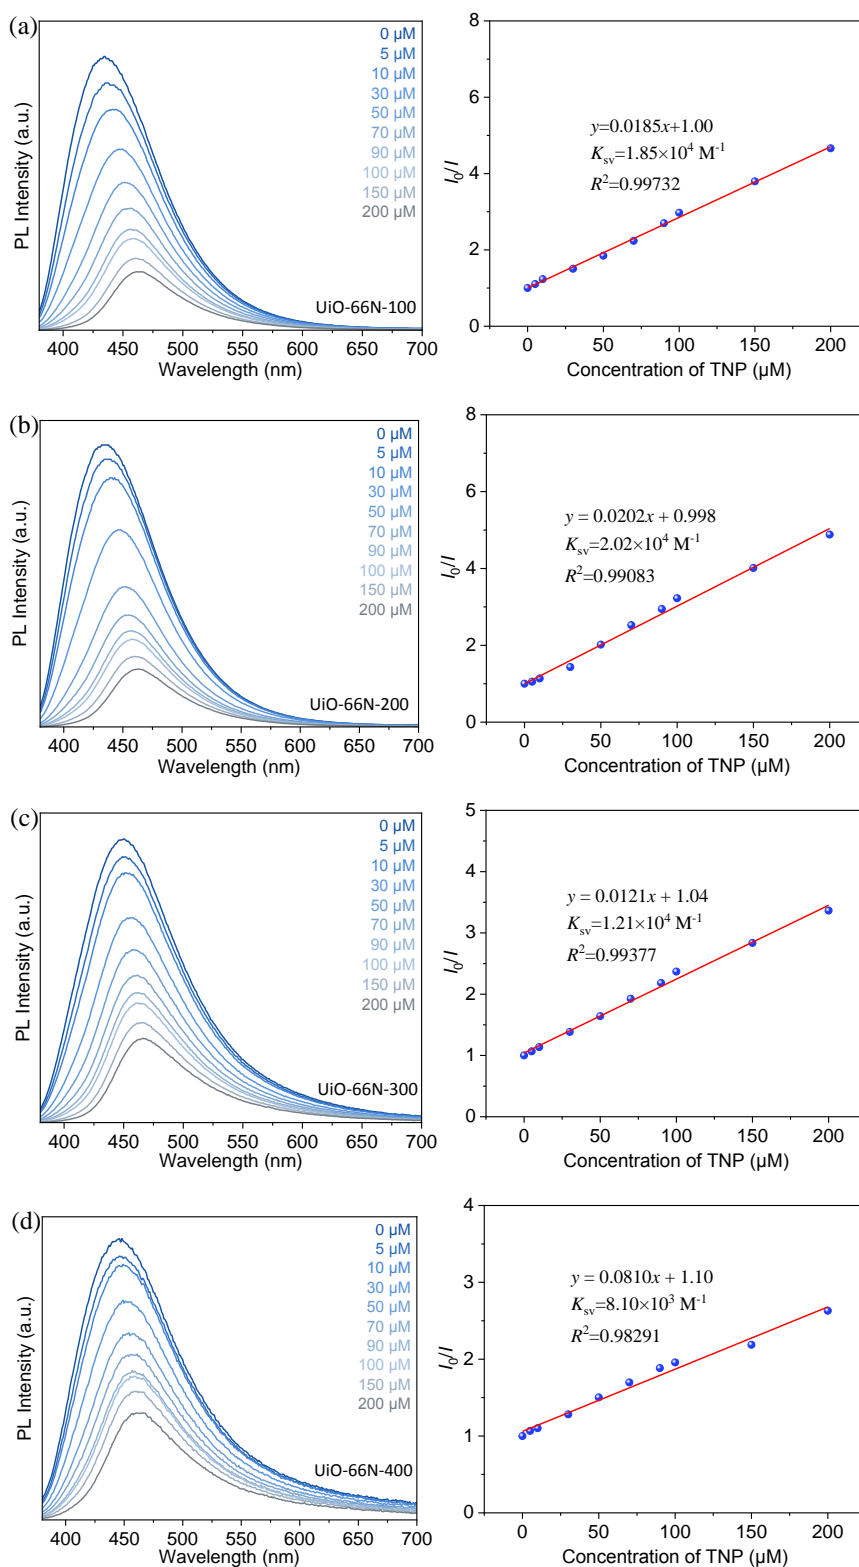

**Figure S16.** PL emission spectra in picric acid solutions with different concentrations ranging from 0 to 200  $\mu\text{M}$  and Stern-Volmer fitting plots of (a) UiO-66N-100, (b) UiO-66N-200, (c) UiO-66N-300, and (d) UiO-66N-400.

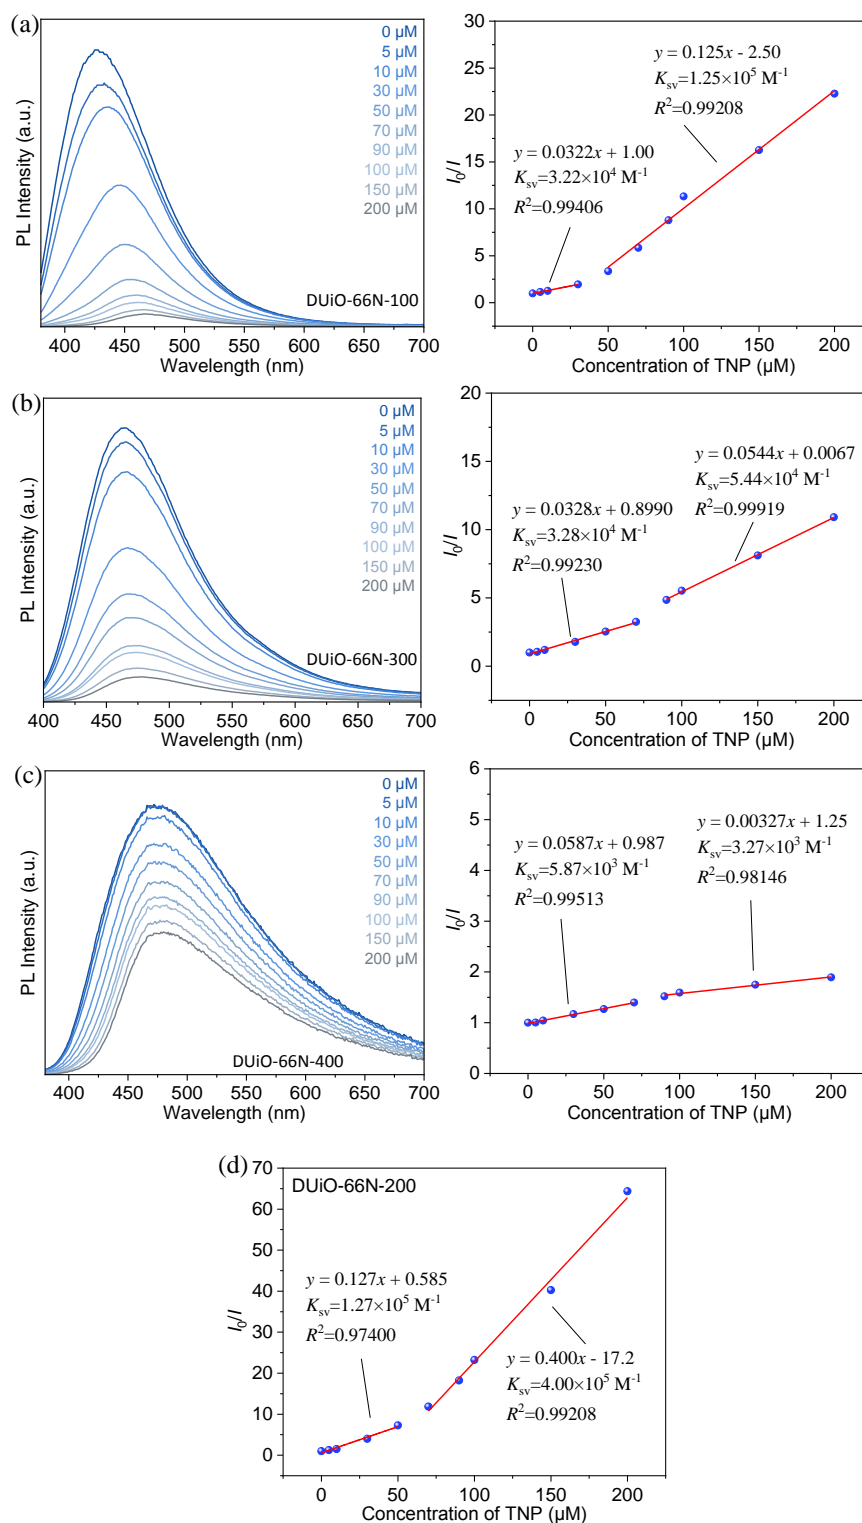

**Figure S17.** PL emission spectra in picric acid solutions with different concentrations ranging from 0 to 200  $\mu\text{M}$  and Stern-Volmer fitting plots of (a) DUiO-66N-100, (b) DUiO-66N-300, and (c) DUiO-66N-400, and Stern-Volmer fitting plots of (d) DUiO-66N-200.

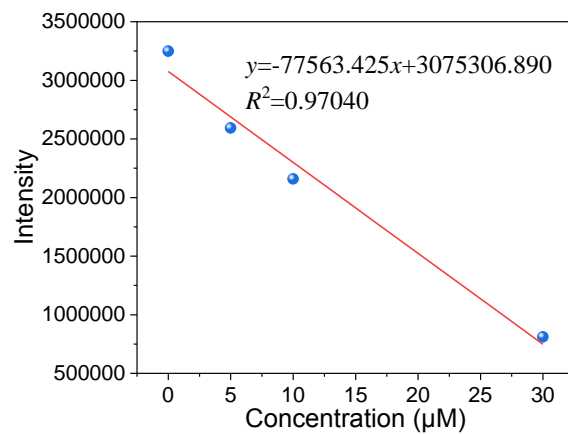

**Figure S18.** Intensity-concentration linear fitting of DUiO-66N-200 for the LOD evaluation.

**Table S1.** Structural model of UiO-66N for PXRD refinement.

| <b>UiO-66N</b>                       |                 |                 |                 |                  |
|--------------------------------------|-----------------|-----------------|-----------------|------------------|
| Space group: <i>F23</i> (No.196)     |                 |                 |                 |                  |
| $a = b = c = 20.816(1) \text{ \AA}$  |                 |                 |                 |                  |
| $\alpha = \beta = \gamma = 90^\circ$ |                 |                 |                 |                  |
| $V = 9020(1) \text{ \AA}^3$          |                 |                 |                 |                  |
| <b>Atom</b>                          | <b><i>x</i></b> | <b><i>y</i></b> | <b><i>z</i></b> | <b>Occupancy</b> |
| Zr1                                  | 0.61545         | 0.50000         | 0.00000         | 1.0              |
| O1                                   | 0.55812         | 0.55812         | -0.05812        | 1.0              |
| H1                                   | 0.58594         | 0.58594         | -0.08594        | 1.0              |
| O2                                   | 0.56024         | 0.56024         | 0.06024         | 1.0              |
| O3                                   | 0.66873         | 0.49848         | 0.08898         | 1.0              |
| O4                                   | 0.58893         | 0.4985          | 0.16878         | 1.0              |
| C1                                   | 0.6496          | 0.49592         | 0.14966         | 1.0              |
| C2                                   | 0.70084         | 0.48749         | 0.20091         | 1.0              |
| C3                                   | 0.68392         | 0.48444         | 0.26763         | 1.0              |
| H3                                   | 0.63313         | 0.48498         | 0.28269         | 0.5              |
| C4                                   | 0.76755         | 0.48382         | 0.18392         | 1.0              |
| H4                                   | 0.78254         | 0.48394         | 0.13311         | 0.5              |
| C5                                   | 0.71536         | 0.49008         | 0.37852         | 0.5              |
| H5                                   | 0.75212         | 0.49596         | 0.41871         | 0.5              |
| C6                                   | 0.65313         | 0.48919         | 0.39214         | 0.5              |
| H6                                   | 0.63895         | 0.48841         | 0.44505         | 0.5              |
| C7                                   | 0.60902         | 0.48919         | 0.34804         | 0.5              |
| H7                                   | 0.55611         | 0.48841         | 0.36221         | 0.5              |
| C8                                   | 0.62265         | 0.49008         | 0.2858          | 0.5              |
| H8                                   | 0.58241         | 0.49558         | 0.24903         | 0.5              |



**Table S2.** Porosity data of UiO-66N and DUiO-66N as well as their calcinated samples.

| Sample       | BET surface area<br>(m <sup>2</sup> /g) | Langmuir surface<br>area (m <sup>2</sup> /g) | pore volume<br>(cm <sup>3</sup> /g, $P/P_0 = 0.2$ ) |
|--------------|-----------------------------------------|----------------------------------------------|-----------------------------------------------------|
| UiO-66N      | 661                                     | 853                                          | 0.31                                                |
| UiO-66N-100  | 660                                     | 853                                          | 0.30                                                |
| UiO-66N-200  | 641                                     | 852                                          | 0.29                                                |
| UiO-66N-300  | 641                                     | 821                                          | 0.28                                                |
| UiO-66N-400  | 614                                     | 805                                          | 0.28                                                |
| DUiO-66N     | 1117                                    | 1359                                         | 0.50                                                |
| DUiO-66N-100 | 1117                                    | 1359                                         | 0.48                                                |
| DUiO-66N-200 | 1013                                    | 1318                                         | 0.45                                                |
| DUiO-66N-300 | 681                                     | 926                                          | 0.32                                                |
| DUiO-66N-400 | 177                                     | 290                                          | 0.10                                                |

**Table S3.** Quenching data of UiO-66N-X and DUiO-66N-X.

| sample \ Concentration of TNP ( $\mu\text{M}$ )<br>$I_0/I$ | 0    | 5    | 10   | 30   | 50   | 70    | 90    | 100   | 150   | 200   |
|------------------------------------------------------------|------|------|------|------|------|-------|-------|-------|-------|-------|
| UiO-66N-100                                                | 1.00 | 1.11 | 1.23 | 1.51 | 1.85 | 2.24  | 2.7   | 2.97  | 3.79  | 4.66  |
| UiO-66N-200                                                | 1.00 | 1.05 | 1.14 | 1.43 | 2.02 | 2.53  | 2.94  | 3.22  | 4.01  | 4.88  |
| UiO-66N-300                                                | 1.00 | 1.07 | 1.14 | 1.38 | 1.64 | 1.93  | 2.18  | 2.37  | 2.84  | 3.36  |
| UiO-66N-400                                                | 1.00 | 1.07 | 1.10 | 1.28 | 1.50 | 1.70  | 1.88  | 1.96  | 2.19  | 2.63  |
| DUiO-66N-100                                               | 1.00 | 1.15 | 1.26 | 1.96 | 3.36 | 5.85  | 8.79  | 11.33 | 16.26 | 22.27 |
| DUiO-66N-200                                               | 1.00 | 1.25 | 1.51 | 4.00 | 7.26 | 11.87 | 18.24 | 23.21 | 40.23 | 64.34 |
| DUiO-66N-300                                               | 1.00 | 1.05 | 1.19 | 1.78 | 2.53 | 3.25  | 4.86  | 5.53  | 8.11  | 10.91 |
| DUiO-66N-400                                               | 1.00 | 1.00 | 1.04 | 1.17 | 1.27 | 1.40  | 1.52  | 1.59  | 1.75  | 1.89  |
| CDs                                                        | 1.00 | 1.10 | 1.24 | 1.72 | 2.45 | 3.33  | 4.38  | 4.93  | 7.90  | 11.87 |

**Table S4.** Comparison of luminescent sensing performance towards picric acid.

| MOFs                                                                  | Solvent              | $K_{sv}$ ( $M^{-1}$ ) | LOD                      | Ref.      |
|-----------------------------------------------------------------------|----------------------|-----------------------|--------------------------|-----------|
| DUiO-66N-200                                                          | MeOH                 | $4.00 \times 10^5$    | $6.54 \times 10^{-7}$ M  | This work |
| $[Me_2NH_2]_4[Zn_6(qptc)_3(trz)_4] \cdot 6H_2O$                       | DMF                  | $2.08 \times 10^6$    | NA                       | [2]       |
| Eu@MOF-253                                                            | EtOH                 | $1.58 \times 10^6$    | 10 nM                    | [3]       |
| $\{[Zn(adc)(avp)_2(H_2O)] \cdot (H_2O)_3\}_n$                         | MeCN                 | $3.938 \times 10^5$   | $0.51 \times 10^{-6}$ M  | [4]       |
| Cd@MOF                                                                | H <sub>2</sub> O     | $2.176 \times 10^5$   | $0.54 \times 10^{-6}$ M  | [5]       |
| $\{[Cd(\mu_2-BA)_2(ClO_4)_2] \cdot n(DCM)\}_n$                        | MeCN                 | $1.39 \times 10^5$    | 0.054 $\mu$ M            | [6]       |
| $[Zn_4(DMF)(urotropine)_2(NDC)_4]$                                    | H <sub>2</sub> O     | $1.083 \times 10^5$   | 1.63 ppm (7.1 $\mu$ M)   | [7]       |
| $[Cd(L_2)] \cdot (DMF)_{0.92}$                                        | DMF                  | $9.3 \times 10^4$     | 0.3 ppm                  | [8]       |
| $[Zn_2(NH_2BDC)_2(dpNDI)]_n$                                          | H <sub>2</sub> O     | $7.3 \times 10^4$     | 0.3 ppm (1.31 $\mu$ M)   | [9]       |
| $[Cd_5(TCA)_4(H_2O)_2]$                                               | DMF                  | $5.9 \times 10^4$     | 1.7 nM                   | [10]      |
| $Zn_2(TZBPDC)(\mu_3-OH)(H_2O)_2$                                      | CHCl <sub>3</sub>    | $4.9 \times 10^4$     | $2.78 \times 10^{-7}$ M  | [11]      |
| $[Zn_3(bpg)_{1.5}(azdc)_3](DMF)_{5.9}(H_2O)_{1.05}$                   | DMF                  | $4.6 \times 10^4$     | 0.4 $\mu$ M              | [12]      |
| $[Zn_2(TPOM)(NH_2-BDC)_2] \cdot 4H_2O$                                | DMF                  | $4.60 \times 10^4$    | $9.8 \times 10^{-7}$ M   | [13]      |
| $[Zn_8(ad)_4(BPDC)_6O \cdot 2Me_2NH_2] G$                             | H <sub>2</sub> O     | $4.6 \times 10^4$     | $1.29 \times 10^{-8}$ M  | [14]      |
| Zr-NDI MOF                                                            | H <sub>2</sub> O     | $4.057 \times 10^4$   | $2.78 \times 10^{-7}$ M  | [15]      |
| $Cd_4(L)_2(L_2)_3(H_2O)_2$                                            | EtOH                 | $3.89 \times 10^4$    | 1.98 ppm                 | [16]      |
| $[(Zn_4O)(DCPB)_3] \cdot 11DMF \cdot 5H_2O$                           | DMF                  | $3.7 \times 10^4$     | NA                       | [17]      |
| $[Cd_2(NDC)_{0.5}(PCA)_2] \cdot G_x$                                  | MeCN                 | $3.5 \times 10^4$     | NA                       | [18]      |
| $[Zn_2(Py_2TTz)_2(BDC)_2] \cdot 2(DMF) \cdot 0.5(H_2O)$               | H <sub>2</sub> O     | $3.257 \times 10^4$   | 0.93 $\mu$ M             | [19]      |
| $[(CH_3)_2NH_2]_3[Zn_4Na(L_3)_3] \cdot 4CH_3OH \cdot 2DMF$            | DMF                  | $3.2 \times 10^4$     | 0.1 mM                   | [20]      |
| $\{[Zn_2(L)_2(azp)](DMF)_2 \cdot (H_2O)\}_n$                          | H <sub>2</sub> O     | $3.11 \times 10^4$    | 0.00182 mM               | [21]      |
| $[ \{Cu_2(L)(oba)_2\} \cdot DMF \cdot H_2O ]_a$                       | MeOH                 | $3.1 \times 10^4$     | $2.265 \times 10^{-5}$ M | [22]      |
| IRMOF-3                                                               | DMF/H <sub>2</sub> O | $2.99 \times 10^4$    | 0.1 ppm                  | [23]      |
| $[Cu(L)(I)]_2 \cdot DMF \cdot MeCN$                                   | MeCN                 | $2.9 \times 10^4$     | 0.0066 mM                | [24]      |
| $Zr_6O_4(OH)_4(L)_6$                                                  | H <sub>2</sub> O     | $2.9 \times 10^4$     | 2.6 $\mu$ M              | [25]      |
| UiO-68-mtpdc/etpdc                                                    | MeOH                 | $2.8 \times 10^4$     | NA                       | [26]      |
| $[Zr_6O_4(OH)_4(BTDB)_6] \cdot 8H_2O \cdot 6DMF$                      | MeOH                 | $2.49 \times 10^4$    | $1.63 \times 10^{-6}$ M  | [27]      |
| $[Zn_2(L)_2(dpyb)]$                                                   | DMA                  | $2.4 \times 10^4$     | NA                       | [28]      |
| $\{[Zn(IPA)(L)]\}_n$                                                  | H <sub>2</sub> O     | $2.16 \times 10^4$    | 28 ppb                   | [29]      |
| $[Eu_3(bpydb)_3(HCOO)(\mu_3-OH)_2(DMF)] \cdot (DMF)_3 \cdot (H_2O)_2$ | H <sub>2</sub> O     | $2.1 \times 10^4$     | 4.98 $\mu$ M             | [30]      |
| $[Tb_2(L_9)_3(H_2O)_2] \cdot 21H_2O$                                  | H <sub>2</sub> O     | $9.2 \times 10^3$     | 67 ppb                   | [31]      |

## References

- [1] G. C. Shearer, S. Chavan, J. Ethiraj, J. G. Vitillo, S. Svelle, U. Olsbye, C. Lamberti, S. Bordiga, K. P. Lillerud, *Chem. Mater.* **2014**, *26*, 4068-4071.
- [2] X. X. Jia, R. X. Yao, F. Q. Zhang, X. M. Zhang, *Inorg. Chem.* **2017**, *56*, 2690-2696.
- [3] L. Chen, Z. Cheng, X. Peng, G. Qiu, L. Wang, *Anal. Methods* **2022**, *14*, 44-51.
- [4] S. Khan, A. Hazra, B. Dutta, Akhtaruzzaman, M. J. Raihan, P. Banerjee, M. H. Mir, *Cryst. Growth Des.* **2021**, *21*, 3344-3354.
- [5] A. Hazra, S. Bej, A. Mondal, N. C. Murmu, P. Banerjee, *ACS Omega* **2020**, *5*, 15949-15961.
- [6] S. I. Vasylevskiy, D. M. Bassani, K. M. Fromm, *Inorg. Chem.* **2019**, *58*, 5646-5653.
- [7] S. Mukherjee, A. V. Desai, B. Manna, A. I. Inamdar, S. K. Ghosh, *Cryst. Growth Des.* **2015**, *15*, 4627-4634.
- [8] S. Senthilkumar, R. Goswami, V. J. Smith, H. C. Bajaj, S. Neogi, *ACS Sustain. Chem. Eng.* **2018**, *6*, 10295-10306.
- [9] S. Singh Dhankhar, N. Sharma, S. Kumar, T. J. Dhilip Kumar, C. M. Nagaraja, *Chem. Eur. J.* **2017**, *23*, 16204-16212.
- [10] M. Venkateswarulu, A. Pramanik, R. R. Koner, *Dalton Trans.* **2015**, *44*, 6348-6352.
- [11] Y. Hu, M. Ding, X. Q. Liu, L. B. Sun, H. L. Jiang, *Chem. Commun.* **2016**, *52*, 5734-5737.
- [12] R. Goswami, S. C. Mandal, B. Pathak, S. Neogi, *ACS Appl. Mater. Interfaces* **2019**, *11*, 9042-9053.
- [13] R. Lv, J. Wang, Y. Zhang, H. Li, L. Yang, S. Liao, W. Gu, X. Liu, *J. Mater. Chem. A* **2016**, *4*, 15494-15500.
- [14] B. Joarder, A. V. Desai, P. Samanta, S. Mukherjee, S. K. Ghosh, *Chem. Eur. J.* **2015**, *21*, 965-969.
- [15] G. Radha, T. Leelasree, D. Muthukumar, R. S. Pillai, H. Aggarwal, *New J. Chem.* **2021**, *45*, 12931-12937.
- [16] T. K. Pal, N. Chatterjee, P. K. Bharadwaj, *Inorg. Chem.* **2016**, *55*, 1741-1747.
- [17] H. He, Y. Song, F. Sun, Z. Bian, L. Gao, G. Zhu, *J. Mater. Chem. A* **2015**, *3*, 16598-16603.
- [18] S. S. Nagarkar, B. Joarder, A. K. Chaudhari, S. Mukherjee, S. K. Ghosh, *Angew. Chem. Int. Ed.* **2013**, *52*, 2881-2885.
- [19] Z.-W. Zhai, S.-H. Yang, M. Cao, L.-K. Li, C.-X. Du, S.-Q. Zang, *Cryst. Growth Des.* **2018**, *18*, 7173-7182.
- [20] E.-L. Zhou, P. Huang, C. Qin, K.-Z. Shao, Z.-M. Su, *J. Mater. Chem. A* **2015**, *3*, 7224-7228.
- [21] S. Senthilkumar, R. Goswami, N. L. Obasi, S. Neogi, *ACS Sustain. Chem. Eng.* **2017**, *5*, 11307-11315.
- [22] P. Rani, Gauri, A. Husain, K. K. Bhasin, G. Kumar, *Cryst. Growth Des.* **2020**, *20*, 7141-7151.
- [23] J. Z. Wei, X. L. Wang, X. J. Sun, Y. Hou, X. Zhang, D. D. Yang, H. Dong, F. M. Zhang, *Inorg. Chem.* **2018**, *57*, 3818-3824.
- [24] S. Khatua, S. Goswami, S. Biswas, K. Tomar, H. S. Jena, S. Konar, *Chem. Mater.* **2015**, *27*, 5349-5360.
- [25] S. S. Nagarkar, A. V. Desai, S. K. Ghosh, *Chem. Commun.* **2014**, *50*, 8915-8918.
- [26] Q. Y. Li, Z. Ma, W. Q. Zhang, J. L. Xu, W. Wei, H. Lu, X. Zhao, X. J. Wang, *Chem. Commun.* **2016**, *52*, 11284-11287.
- [27] M. Sk, S. Biswas, *CrystEngComm* **2016**, *18*, 3104-3113.
- [28] Z. Q. Shi, Z. J. Guo, H. G. Zheng, *Chem. Commun.* **2015**, *51*, 8300-8303.
- [29] B. Parmar, Y. Rachuri, K. K. Bisht, R. Laiya, E. Suresh, *Inorg. Chem.* **2017**, *56*, 2627-2638.
- [30] X. Z. Song, S. Y. Song, S. N. Zhao, Z. M. Hao, M. Zhu, X. Meng, L. L. Wu, H. J. Zhang, *Adv. Funct. Mater.* **2014**, *24*, 4034-4041.
- [31] R. Fu, S. Hu, X. Wu, *J. Mater. Chem. A* **2017**, *5*, 1952-1956.
